34 progenitors arise in the extraembryonic tissues of the yolk sac, before hematopoietic stem  
35 cells (HSCs) emerge in the embryo proper (Palis, 2016). The first “primitive” wave, gives  
36 rise to erythrocytes, megakaryocytes and macrophages from embryonic day E7.25 in the  
37 mouse embryo (Palis *et al.*, 1999; Tober *et al.*, 2007). From E8.25, the first “definitive”  
38 progenitors, called erythro-myeloid progenitors (EMPs) constitute the second wave and  
39 these can be distinguished from the primitive progenitors by their potential to generate  
40 granulocytes (McGrath *et al.*, 2015). Intraembryonic haematopoiesis is established during  
41 E10.5-E11.5 by the emergence of HSCs, the only cells that can sustain the lifespan  
42 production of all blood lineages, and maintain this property upon transplantation  
43 (Medvinsky and Dzierzak, 1996).

44 Despite many laboratories successfully recapitulating the development of multilineage  
45 hematopoietic progenitors from hPSCs in vitro, the robust derivation of bona fide long-term  
46 repopulating hematopoietic stem cells (HSCs) has not been achieved (Ditadi, Sturgeon  
47 and Keller, 2017). Two main strategies have been employed in attempts to overcome this  
48 challenge: modification of culture conditions to mimic embryonic ontogeny and the  
49 overexpression of transcription factors in genetic programming experiments (Ivanovs *et al.*,  
50 2017). Because the ontogeny of the human hematopoietic system is poorly characterised,  
51 reproduction of the natural molecular cues occurring in the embryo is arduous.

52 Furthermore, the broad overexpression of target genes identified by bulk approaches has  
53 failed to precisely reproduce the transcriptome of HSCs. In addition, the dynamic nature  
54 and the heterogeneity of the hematopoietic progenitor cell populations that arise during  
55 development poses additional confounders to the identification of both signalling and  
56 target genes. To overcome these limitations, we propose that the in-depth characterisation  
57 of hPSC-derived hematopoietic progenitors at the single cell level, and the subsequent  
58 comparison with data sets obtained from haematopoietic progenitors generated in vivo, will  
59 be instrumental for the development of new and improved strategies for their in vitro  
60 production. Some single cell expression profiles of hPSC derived hematopoietic cells have  
61 been reported to date, but they either used biased approaches such as preselected  
62 probes (Guibentif *et al.*, 2017), or used a limited number of cells sorted with multiple  
63 markers, thus impacting the heterogeneity resolution and the detection of subpopulations  
64 (Angelos *et al.*, 2018).

65 Combining the use of two reporter cell lines and functional assays we designed a minimal  
66 membrane marker strategy that allows the isolation of a broad, heterogeneous population

67 of hPSC-derived haematopoietic progenitor cells. We showed that the CD235a<sup>-</sup>CD43<sup>+</sup> cell  
68 population contained definitive progenitors marked by the RUNX1C-GFP reporter (Ng *et*  
69 *al.*, 2016) and excluded KLF1-mCherry-expressing committed erythroid cells. To explore  
70 the inherent heterogeneity of this population and to decipher the hierarchy of lineage  
71 priming we generated a large single cell RNA-sequencing data set of 11420 CD235a<sup>-</sup>  
72 CD43<sup>+</sup> cells. Cell surface markers of progenitors and their lineage-primed descendants  
73 were identified and validated using in vitro functional assays. Lineage trajectories  
74 predicted by pseudotime analyses were validated using a chimeric cell culture system  
75 involving a constitutive ZeissGreen reporter iPSC line. This dataset can be compared to in  
76 vivo-sourced human HSC allowing the identification of candidate genes and pathways that  
77 could be modulated for efficient in vitro HSC production.

78

## 79 RESULTS

80

### 81 Minimal marker strategy for the unbiased isolation of hematopoietic progenitors.

82 To resolve the heterogeneity of the definitive haematopoietic progenitor cell population in  
83 an unbiased manner, we used functional assays and reporter cell lines to define a minimal  
84 marker approach for their isolation from differentiating iPSCs.

85 CD235a (Glycophorin A), a broad erythroid lineage marker, has been reported to mark in  
86 vitro the emerging mesoderm specified to primitive human haematopoietic cells (Sturgeon  
87 *et al.*, 2014) and to be retained on primitive erythro-megakaryocytes progenitors (Vodyanik  
88 *et al.*, 2006). To study the identity of CD235a expressing cells in our culture system, we  
89 sorted CD235a<sup>-</sup> and CD235a<sup>+</sup> cells from differentiating iPSCs at day 13 and analysed their  
90 haematopoietic potential in clonogenic assays (Figure 1A, Supplementary Fig 1A). The  
91 vast majority of robust colony forming units (CFU-Cs) were generated from the CD235a<sup>-</sup>  
92 population, while the CD235a<sup>+</sup> cell population generated largely primitive erythroid  
93 colonies and only a few myeloid colonies (Figure 1A), in line with previous reports. Gene  
94 expression analyses revealed that CD235a<sup>-</sup> cells expressed higher levels of progenitor-  
95 associated genes, including *RUNX1C*, *TAL1*, and *GATA2* and lower levels of erythroid  
96 markers (*KLF1*, *GATA1* and *HBE*) compared to CD235a<sup>+</sup> cells (Figure 1B). To verify that  
97 the CD235a<sup>-</sup> population consisted of definitive, rather than primitive, haematopoietic  
98 progenitor cells we used the RUNX1C-EGFP reporter cell line that marks emerging  
99 haematopoietic progenitors (Supplementary Fig 1H-I)(Ng *et al.*, 2016). The *RUNX1* gene

100 encodes different protein isoforms, differentially expressed during development, with  
101 RUNX1C being expressed by the distal promoter in definitive cells in vitro and in vivo  
102 (Sroczynska *et al.*, 2009; Ng *et al.*, 2016). As predicted, RUNX1C-GFP<sup>+</sup> cells were almost  
103 entirely found within the CD235a<sup>-</sup> compartment (Figure 1C) and were marked by CD43  
104 membrane expression (Figure 1D), previously reported to mark human PSC-derived  
105 progenitors (Vodyanik *et al.*, 2006; Garcia-Alegria *et al.*, 2018). When isolated by flow  
106 cytometry, RUNX1C-GFP<sup>+</sup> demonstrated higher number of CFU-Cs compared to the  
107 RUNX1C-GFP<sup>-</sup> population (Figure 1E).

108 We confirmed the primitive erythroid bias of the CD235a<sup>+</sup> population by flow cytometry  
109 analysis of  $\epsilon$ -globin expression, a marker associated with the first wave of erythroid cells  
110 (Supplementary Fig 1B). In the murine embryo, definitive erythroid cells enucleate more  
111 efficiently than their primitive counterparts, that fully enucleate only after persisting in the  
112 bloodstream for several days (Kingsley *et al.*, 2004; McGrath *et al.*, 2008). Thus, to further  
113 confirm the primitive bias of CD235a<sup>+</sup> cells, we cultured isolated CD235a<sup>+</sup> and CD235a<sup>-</sup>  
114 cells in erythroid differentiation conditions for 17 days and assessed the enucleation  
115 efficiency. Consistent with published reports (Olivier *et al.*, 2016; Yang *et al.*, 2017),  
116 enucleation efficiency of iPSC derived erythroid cells is very low, but nonetheless we  
117 observed that the erythroid cells derived from the CD235a<sup>-</sup> population had a higher  
118 potential to enucleate than those derived from CD235a<sup>+</sup> cells (Supplementary Fig 1C). The  
119 expression of the transcription factor KLF1, is initiated prior to erythroid commitment and is  
120 maintained throughout erythropoiesis (Siatecka and Bieker, 2011), thus, we used a KLF1-  
121 mCherry reporter to track erythroid commitment during differentiation (Supplementary Fig  
122 1D). KLF1-mCherry<sup>+</sup> reporter was expressed in cells associated with small primitive  
123 erythroid colonies and restricted to the CD235a<sup>+</sup> cells (Supplementary Fig 1E-F). KLF1-  
124 mCherry-expressing cells showed a limited colony forming potential compared to the  
125 KLF1<sup>-</sup> population (Supplementary Fig 1G).

126 Taken together these data indicate that CD235a<sup>-</sup>CD43<sup>+</sup> cells, from differentiating hPSCs,  
127 contains definitive hematopoietic progenitors and excludes cells derived from the first,  
128 primitive wave. We anticipated that CD235a<sup>-</sup>CD43<sup>+</sup> compartment would also comprise the  
129 early stages of lineage priming, capturing the hierarchy of early human developing  
130 progenitors.

131

132

133 **Single cell RNAseq of iPSCs-derived haematopoietic progenitor cells reveals the**  
134 **transcriptome of naïve and lineage primed progenitors.**

135

136 We collected exclusively suspension cells from two independent replicate cultures at day  
137 13 of differentiation, isolated the CD235a<sup>+</sup>CD43<sup>+</sup> cells containing the definitive  
138 haematopoietic progenitors and subjected them to microfluidic single cell RNA libraries  
139 preparation followed by sequencing and data analyses (Figure 2A). After quality controls  
140 and filtering of the data we obtained the transcriptome of 11420 cells (Supplementary  
141 Figure S1A-E). Following dimensionality reduction through Principal Component Analysis  
142 (PCA), we used graph-based clustering analysis and obtained 9 clusters of cells (Butler *et*  
143 *al.*, 2018a) and visualised on the tSNE projection (Figure 2B). Although the two replicates  
144 did not show obvious differences (Supplementary Figure S2E), we regressed out the batch  
145 effect before pulling the samples together for further analysed. We assigned cell identities  
146 based on the expression of known markers and identified markers from the dataset that  
147 were cluster specific (Figure 2C-D). Clusters containing more immature, unprimed  
148 progenitors were identified by their high level of progenitor-associated genes such as *KIT*  
149 and *GATA2* and their lack of expression of genes associated with specific cell lineages,  
150 and were annotated as naïve populations (Figure 2D). Clusters that displayed expression  
151 of lineage markers were annotated as primed progenitors (Figure 2B-D). These included  
152 clusters of cells primed towards the megakaryocyte (*GP9* and *PF4*), erythroid (*GYPA* and  
153 *KLF1*) and granulocyte (*AZU1* and *PRNT3*) lineages (Figure 2D). Markers for each of the  
154 cell clusters were identified by differentially expressed gene analysis and further supported  
155 the identities assigned to of these clusters (Figure 2C and Supplementary Table S1).

156

157 **Trajectory analyses reveal the hierarchy of in vitro derived hematopoietic**  
158 **progenitors**

159

160 To study the hierarchical relationship between cell populations we performed trajectory  
161 analysis using two different methods: diffusion analysis (Haghverdi *et al.*, 2016) using the  
162 Seurat R package (Butler *et al.*, 2018b) and pseudotemporal ordering, using the Monocle  
163 R package (Qiu *et al.*, 2017) (Figure 3A-D). Diffusion analysis identified a central core from  
164 which three distinct trajectories appeared to emerge. The central core corresponded to  
165 cells belonging to the progenitor clusters that we had annotated as naïve 1 and naïve 2

166 (Figure 3A-B). Branches comprised cells that expressed genes associated with specific  
167 lineages, that we annotated as Ery-, Mega- and Granulo-priming directions. These three  
168 lineages are expected to branch from EMPs, progenitors of the second wave of yolk sac  
169 haematopoiesis (McGrath *et al.*, 2015). Comparable trajectories were observed using  
170 pseudotemporal ordering. After calculating a pseudotime value for each cell, we ordered  
171 them starting from a root state corresponding to the branch containing cells that were  
172 located at the core of the diffusion plot and that we had identified as naïve progenitors in  
173 our original clustering (Figure 3C). Pseudo time reconstruction of the hierarchy showed  
174 that cells we had annotated as naïve 1 were located at the top of the hierarchy and  
175 appeared to progress to naïve 2 cells before entering branches that consisted of lineage  
176 primed cells (Figure 3C-D). Lineage priming was also inferred by the expression of  
177 lineage-associated transcription factors (Figure 3E) that were identified by filtering of  
178 marker genes according to their GO annotation. For instance, erythroid primed clusters  
179 demonstrated expression of both *KLF1* and *MYC* (Figure 3E), with the expression level of  
180 the latter decreasing in Ery 2 compared to Ery1, according to their position within the  
181 differentiation hierarchy (Figure 3D). For mega-primed cluster 1 and 2 we observed the  
182 expression of *GATA1*, *TAL1* and *FLI1* (Figure 3E), a cocktail of genes recently used for  
183 forward programming of hiPSCs to the megakaryocyte lineage (Moreau *et al.*, 2016).  
184 Granulo-primed cells were represented by a separate branch and showed the expression  
185 of *CEBP-D*, *CEBP-B*, *CEBP-A* and *CEBP-E* (Figure 3E).

186

### 187 **CD44 membrane expression marks clonogenic human hematopoietic progenitors.**

188

189 To functionally validate the results of our trajectory analyses, we assessed the  
190 haematopoietic potential of cells that we had defined as naïve progenitor populations. We  
191 filtered the list of marker genes encoding membrane proteins and designed a prospective  
192 sorting strategy to isolate the progenitor populations. Genes encoding the cell surface  
193 markers *CD33*, *CD44*, and *ITGB2* (also known as CD18) were enriched within clusters  
194 associated with the naïve progenitors and so we hypothesised that these markers could  
195 be used for their isolation (Supplementary Figure 3). CD33 was expressed uniformly by  
196 both naïve 1 and naïve 2 populations whereas CD44 and CD18 expression appeared  
197 higher in the naïve 1 population (Supplementary Figure 3). We used CD44 and CD18 to  
198 fractionate the CD235a<sup>-</sup>CD43<sup>+</sup>CD33<sup>+</sup> cell population and identified the naïve 1A

199 (CD44<sup>+</sup>CD18<sup>-</sup>), naïve 1B (CD44<sup>+</sup>CD18<sup>+</sup>) and naïve 2B (CD44<sup>-</sup>CD18<sup>-</sup>) populations (Figure  
200 4A). Trajectory analysis predicted that the cell population defined as naïve 1 was at the top  
201 of the hierarchy and gave rise to the naïve 2 cell population prior to lineage priming (Figure  
202 3C-D). To functionally test this prediction, we used a chimeric co-culture system where  
203 input cells can be tracked within differentiation conditions (Figure 4B). We synchronously  
204 differentiated the SFCi55-ZsGreen iPSC line, that expresses the Zeiss Green reporter in a  
205 constitutive manner (Lopez-Yrigoyen *et al.*, 2018), and their parental SFCi55 line. To verify  
206 the progression from naïve 1 to naïve 2 cells and from naïve 2 to lineage primed cells  
207 detected at day 13, we sorted the naïve 1 cells (CD33<sup>+</sup>CD44<sup>-</sup>CD18<sup>-</sup>) and naïve 2  
208 (CD33<sup>+</sup>CD44<sup>+</sup>CD18<sup>-/+</sup>) from the SFCi55-ZsGreen iPSCs at day 10 and then co-cultured  
209 them with the synchronised parental SCFi55 differentiating iPSCs cells up to day 13. As  
210 predicted from the trajectory analysis, naïve 1 cells were able to generate ZsGreen-  
211 expressing naïve 2 cells in the chimeric culture. We also noted that naïve 1 cells also  
212 retained their immunophenotype, indicating some self-renewal capacity (Figure 4C).  
213 Interestingly, naïve 2 cells demonstrated some potential to acquire the naïve 1 markers,  
214 CD44 and CD18 (Figure 4C), suggesting a degree of fluidity between the progenitors'  
215 compartments. As predicted by the trajectory analysis (Figure 3 A-D), ZsGreen-expressing  
216 naïve 2 cells acquired also the ability to generate haematopoietic cell progeny as predicted  
217 by the trajectory analysis (Figure 3 A-D) comprising erythroid cells (CD235a<sup>+</sup>),  
218 megakaryocytes (CD41<sup>+</sup>) and adherent mature macrophages (25F9<sup>+</sup>) (Supplementary  
219 Figure 3B). We compared the CFU-C capacity of naïve 1 and 2 progenitors that were  
220 present at the different stages of the differentiation protocol. When plated in clonogenic  
221 methylcellulose assays, only cells expressing CD44 on their membranes, naïve 1 cells  
222 isolated from day 10 and 13, formed CFU-C colonies, whereas virtually no colonies were  
223 generated by naïve 2 cells (Figure 4D-E). These data indicate that CD44 membrane  
224 expression alone resolves CFU-C forming cells and supports the hierarchy predicted by  
225 the trajectory analyses (Figure 3A-D). Our results demonstrate that our chimeric co-culture  
226 system is able to assess the lineage output that cannot be assessed by methylcellulose  
227 assays alone. To assess whether the naïve cell populations identified using our unique  
228 sorting strategy showed features of definitive haematopoietic progenitors, we assessed  
229 the expression of the RUNX1C-GFP reporter in these cells. We observed RUNX1C-GFP  
230 expression in both cell types, with a higher proportion of RUNX1C<sup>+</sup> cells in the naïve 1  
231 compared to naïve 2 population (Supplementary Figure 3C). We then focused our



232 attention on the other transcription factors expressed by the progenitor clusters and  
233 identified high levels of *ID2* and *ID4* in naïve progenitors (Figure 3E), with *ID2* highly  
234 expressed in naïve 1. ID genes are targets of BMP signalling, so we predicted that naïve  
235 populations could be modulated by addition of BMPs. To test this hypothesis, we included  
236 BMP4 in the differentiation culture from day 10, when both naïve 1 and 2 were present and  
237 then assessed the proportion of these cells by day 13. The frequency of both naïve 1 and  
238 2 cells increased by 25% and 59% respectively in the presence of BMP4 indicating that  
239 this signalling pathway was involved in their expansion (Figure 4F).

240

241

### 242 **CD44 and LMO4 are co-expressed in definitive hematopoietic sites in the mouse** 243 **embryo.**

244

245 We identified CD44 as a marker of naïve progenitors with tri-lineage potential ascribable to  
246 the EMPs progenitors that, in the mouse model, reside in the yolk vasculature. To test if  
247 this marker was labelling hematopoietic clusters in the mouse yolk sac we assessed CD44  
248 expression by immunostaining and flow cytometry (Figure 5A-B). At E10.5, CD44 was  
249 expressed on endothelial cells in a bimodal pattern, with vessels expressing low and high  
250 levels, with the latter containing very bright clusters of haematopoietic cells (Figure 5B). By  
251 flow cytometry, we observed that by E11, CD44<sup>high</sup> cells contained all the CD45<sup>+</sup> cells and  
252 a proportion of VeCad<sup>+</sup> (Figure 5A). Within the embryo proper, CD44 was expressed on  
253 the membrane of endothelial cells within the dorsal aorta, contrary to the venous  
254 endothelial layers that were negative for CD44 (Figure 5C). By flow cytometry we  
255 observed that CD44 was co-expressed with CD45<sup>+</sup> in the AGM region. These data  
256 suggest that CD44 is expressed on haemogenic endothelial cells and it is retained on the  
257 hematopoietic cells arising from it.

258 From our single cell RNA profiles, we observed that the transcription factor *LMO4* was  
259 expressed in cells within the progenitor clusters and subsequently downregulated upon  
260 lineage priming (Figure 3E and 5D). As this transcription factor has not been associated  
261 previously with definitive haematopoietic progenitors, we assessed its expression during  
262 haematopoietic development in vivo. We immunostained sections of the aorta-gonad-  
263 mesonephros (AGM) region of the developing E10.5 mouse embryo where intra-aortic  
264 hematopoietic clusters (IAHC) are mainly composed of hematopoietic progenitors and pre-



265 HSCs (Figure 5E, supplementary Figure 3D). CD44 was highly expressed by cells of the  
266 IAHCs and by single circulating cells (Figure 5E, supplementary Figure 3D) and at lower  
267 levels by the aortic endothelium. LMO4 was co-expressed at high levels in the nuclei of  
268 cells with CD44 on their membrane, both in IAHC cells and in rare circulating cells (Figure  
269 5E, supplementary Figure 3D). Neither CD44 nor LMO4 were expressed in the majority of  
270 circulating cells within the lumen of embryonic vessels (Figure 5E), which at this stage of  
271 development are mainly primitive erythroid cells.

272

273

### 274 **Identification of membrane markers of lineage primed progenitors**

275

276 We identified clusters with lineage primed signatures and selected membrane markers that  
277 we predicted could be used for their isolation. Although our original sorting strategy  
278 excluded CD235a<sup>+</sup> erythroid cells, we nevertheless detected erythroid primed progenitors  
279 (Figure 3B). Ery-primed clusters 1 and 2 both showed expression of *EPCAM* and *MYC*  
280 (Figure 3E, 6A), indicative of early committed erythroid cells (Lammers *et al.*, 2002;  
281 Jayapal *et al.*, 2010). We confirmed that EPCAM (also known as CD326) was expressed  
282 in the majority of CD235a<sup>+</sup> cells at day 13 of iPSC differentiation (Figure 6B). We also  
283 detected a small number of CD326<sup>+</sup>CD235a<sup>-</sup> cells indicating that CD326 might be marking  
284 early erythroid commitment prior to CD235a acquisition (Figure 6B). To further explore  
285 this, we assessed the dynamics of these markers during the in vitro erythroid  
286 differentiation of umbilical cord blood CD34<sup>+</sup> (CB34<sup>+</sup>) cells. At day 10 of differentiation,  
287 CD326 is expressed in CD235<sup>-</sup> and CD235a<sup>low</sup> cells but not in CD235a<sup>high</sup> cells, that  
288 correspond to more mature erythroid cells (Figure 6B, Supplementary figure 4A). No  
289 CD326 expression was detected in cells at day 18 of the differentiation protocol (when the  
290 majority of cells are mature CD235a<sup>+</sup> cells) nor in the mature erythrocytes found in adult  
291 peripheral blood (Supplementary figure 4A). Taken together these data suggest that  
292 CD326 (EPCAM) marks early erythroid progenitors in both hiPSC-, foetal- and adult-  
293 derived cells.

294 Three clusters with megakaryocyte and platelet signatures were identified (Mega-primed 1,  
295 2 and 3), characterised by a high level of expression of *ITGA2B* (CD41), *GP9*, *PF4* (Figure  
296 2C-D and Supplementary Table 1). We observed that the cell surface markers such as  
297 ICAM2 and CD9 seemed to be highly expressed later in their differentiation, in cluster

298 Mega-primed 3 (Figure 6C). We confirmed the co-expression of these markers by flow  
299 cytometry and observed a population of CD41<sup>+</sup>CD9<sup>+</sup>ICAM2<sup>+</sup> cells, with around 85% of the  
300 CD41<sup>+</sup> cells also expressing CD42a (Figure 6D). When CD41<sup>+</sup>CD42<sup>+</sup> cells were sorted  
301 (Figure 6E), no polyploidy was detected supporting their immature stage (Figure 6F-  
302 Supplementary figure 4B).

303 In the mouse yolk sac, EMPs are distinguished from primitive haematopoietic progenitors  
304 by their capacity to initiate granulopoiesis, as indicated by morphological identification of  
305 neutrophils, eosinophils, basophils and mast cells (McGrath *et al.*, 2015). We identified a  
306 granulo-primed cluster in which granulocyte lineage markers such as *MPO*, *AZU1*,  
307 *RNASE2* together with *ITGB2* (coding for CD18) as a membrane marker (Figure 3C,  
308 Supplementary Table1). This observation, together with the potential of naïve 1 to give rise  
309 to granulocyte colonies, supports the definitive nature of the naïve 1 cluster, ascribable to  
310 an EMP-like progenitor. We analysed the nuclear morphology of sorted CD235a<sup>-</sup>  
311 CD43<sup>+</sup>CD18<sup>+</sup>CD33<sup>+</sup>CD44<sup>-</sup> cells by microscopy. As expected, we detected the existence of  
312 granulocytes and monocytes (and by inference, EMPs) by morphology (Figure 6G). To  
313 resolve this heterogeneity, we sub-clustered the data and identified three putative cell  
314 populations whose identity could be inferred by marker gene expression (Figure 6H-L).  
315 One of these sub-clusters co-expressed genes associated with the naïve unprimed  
316 progenitors (*LMO4*, *GATA2* and *FST*) as well as genes associated with the eosinophil  
317 lineage such as EPX, eosinophil peroxidase, and the proteoglycans PRG2 and PRG3  
318 (Soragni *et al.*, 2015), and we speculate that these have a pro-eosinophil identity (Figure  
319 6I-L). Another cluster appeared to express high levels of neutrophil-associated genes such  
320 as *MPO*, *AZU1*, *PRTN3*, *LYZ*, *S100A8* and *S100A9* and was thus annotated as a Pro-  
321 Neutrophil cluster (Figure 6I-L). Finally, we typed the third cluster as monocytes due to the  
322 expression of monocyte associated signature such as *CSF1R*, *CXC3R1*, and *IRF8* (Figure  
323 6I-L). Noteworthy, *RUNX3* expression was specifically associated with the monocyte  
324 subcluster (Figure 6I). *RUNX3* role in developmental myelopoiesis has been shown in  
325 zebrafish, where treatment with *RUNX3* morpholino lead to reduction of both stem cells  
326 and macrophages (Kalev-Zylinska *et al.*, 2003), and in mouse where it is expressed in  
327 Langerhans cells, a type of dendritic cell (Fainaru *et al.*, 2004). Tissue resident  
328 macrophages and dendritic cells are seeded by yolk sac monocytes that migrate to the  
329 embryo (Schulz *et al.*, 2012; Mass *et al.*, 2016; Stremmel *et al.*, 2018). Opposite to  
330 primitive macrophages, these cells develop from *c-myb*-expressing EMPs through a

331 monocyte intermediate (Hoeffel *et al.*, 2015), further supporting our EMP-like identity of our  
332 human *MYB*<sup>+</sup> progenitors (supplementary table 1).

333 The lack of clusters with a fully differentiated transcriptome is in line with the fact that we  
334 did not employ terminal differentiation culture conditions and focused on the progenitor  
335 populations marked by CD43. These data show the competence of human iPSC-derived  
336 hematopoietic progenitors to initiate granulopoiesis in vitro and provide single cell  
337 transcriptome of human granulocyte progenitors.

338

## 339 **Discussion**

340

341 We describe here the single cell transcriptome of human erythro-myeloid progenitors and  
342 their descendent primed cells. The priming direction observed from the naïve progenitors,  
343 confirmed by immunostaining and chimeric culture experiments, showed the ability of  
344 these cells to generate erythroid cells, megakaryocytes, monocytes, macrophages and  
345 granulocytes. This lineage output corresponds to that of mouse EMPs, definitive  
346 progenitors of the yolk sac (McGrath *et al.*, 2015; Frame *et al.*, 2016). Within the naïve  
347 progenitors, we observed high levels of *CD44* mRNA expression, a protein reported to be  
348 expressed in normal and leukemic hematopoietic cells (Zöller, 2015). Recently, a single  
349 cell transcriptome analysis reported that CD44 marks hematopoietic stem and progenitor  
350 cells in the mouse AGM, and functions in endothelium to hematopoietic transition, EHT  
351 (Oatley *et al.*, 2018). We confirmed CD44 expression on the aortic endothelium of the  
352 AGM region and, showed expression on some of the vessels in the yolk sac together with  
353 the hematopoietic clusters associated with these. From our functional assays, membrane  
354 expression of CD44 identifies human progenitors with clonogenic potential. Pseudotime  
355 and diffusion analyses showed that naïve 1, enriched for *CD44* expression, was at the top  
356 of the hierarchy, followed by naïve 2 and finally lineage primed clusters. To reveal the full  
357 lineage potential of progenitor cells we developed a chimeric culture system by co-  
358 culturing sorted ZeissGreen<sup>+</sup> population with untagged differentiating cells. When cells  
359 were exposed to the more complex microenvironmental cues, achieved in the  
360 differentiation, the lineage potential reflected by the priming signatures and the lineage  
361 output coincided. Despite the use of controlled differentiation conditions without feeder cell  
362 support or serum addition, the differentiating cells are a source of cytokines themselves,  
363 and this could explain the need of a system to trace lineage output of subpopulation while

364 exposing the cells to the same stimuli from where the data set was obtained. Using  
365 chimeric tracing we also observed that progenitors are capable of moving between the  
366 naïve states, as well as progressing into primed states in a continuous fashion. Many  
367 studies employing single cell transcriptome and proteomic strategies appreciated a  
368 continuum of cell states as opposed to the sequential discrete cell types depicted in text-  
369 book hematopoietic hierarchies (Paul *et al.*, 2015; Velten *et al.*, 2017; Rodriguez-Fraticelli  
370 *et al.*, 2018; Knapp *et al.*, 2019). Our results showed that continuity is also associated with  
371 bidirectional fluidity between un-primed states suggesting a degree of cell plasticity, that  
372 during development could provide an advantage to face the changing demand of the  
373 growing embryo. The frequency of the naïve population was increased by BMP4  
374 stimulation, and so pose a question on the role of BMP signalling on yolk sac EMP derived  
375 haematopoiesis, that has not been characterised so far. In the aorta-gonad-mesonephros,  
376 endothelial cells express BMP4 (Souilhol *et al.*, 2016), and display active BMP pathway  
377 with BMP-responsive element reporter (Crisan *et al.*, 2015). In contrast, within the HSC  
378 compartment BMP4 signalling needs to be inhibited (Souilhol *et al.*, 2016), via BMPER, for  
379 their full maturation (McGarvey *et al.*, 2017). Interestingly, here we showed that the naïve  
380 progenitors express high levels of Follistatin, a potent inhibitor of both BMP and TGF $\beta$ , that  
381 could act as an autocrine/paracrine protection system against BMP-TGF signalling.  
382 Together with the observation of the BMP activity in the endothelial compartment, this may  
383 suggest that BMP4 could act by promoting the emergence of progenitors from the  
384 endothelium rather than expanding them. We show here that mouse and human  
385 progenitors co-express CD44 and LMO4, a LIM-domain protein widely expressed in the  
386 mouse embryo (Grutz, Forster and Rabbitts, 1998). LMOs form multiprotein complexes, as  
387 in the heptad complex where LMO2 binds other 6 transcription factors involved in HSPC  
388 (Wilson *et al.*, 2010), or in complexes involved in erythropoiesis (Wadman *et al.*, 1997).  
389 Recent sequencing experiments detected LMO4 expression in both adult mouse HSC (Lai  
390 *et al.*, 2018) and human granulocytes progenitors in the bone marrow (Paul *et al.*, 2015)  
391 but which proteins are bound to LMO4 in the progenitor compartment has yet to be  
392 identified. We also described high levels of ID2 and ID4 within the progenitors. IDs, like  
393 LMOs proteins, do not present DNA binding domain and rather act through binding of  
394 other proteins. This class of protein has not been extensively exploited in programming  
395 approaches as much as other transcription factors (Ivanovs *et al.*, 2017). Overexpression  
396 of IDs or LMOs could not only provide an alternative approach for programming gene

397 cocktails, but it could also be employed to maintain the progenitor state in culture and  
398 prevent their differentiation. In support of this idea, overexpression of ID2 in human HSC  
399 from cord blood has been reported to enhances their functional stemness in vivo  
400 (van Galen *et al.*, 2014).

401 Taken together our data show that cytokine stimulation of hPSCs in vitro recapitulate  
402 extraembryonic haematopoiesis with erythro-myeloid progenitors and describe CD44 as a  
403 marker for human EMPs. We identified the transcriptome of naïve and primed human  
404 progenitors in vitro, which represent a potential source for both monocytes/macrophages  
405 and granulocytes for therapeutic application and provides an important resource for the  
406 identification of target genes for HSC generation in vitro.

407

#### 408 **Acknowledgment**

409 The work was funded by Wellcome Trust (Grant No. 102610), MRC Innovate UK (Grant  
410 No. 102853), BBSRC (Grant No. S002219/1). AF received a Carnegie Incentive Grant  
411 (Grant No. RIG008218). Sequencing and following alignment was carried out by  
412 Edinburgh Genomics, The University of Edinburgh. Edinburgh Genomics is partly  
413 supported through core grants from NERC (R8/H10/56), MRC (MR/K001744/1) and  
414 BBSRC (BB/J004243/1). We thank Andrew Elefanty for sharing the RUNX1C-GFP cell  
415 line. We thank Fiona Rossi, Claire Cryer, Bindi Heer from the Flow Facility, Bertand  
416 Verney and Matthieu Vermeren from the imaging facility.

417

#### 418 **Author Contribution**

419 FA, designed and performed research, analyzed the data and wrote the manuscript. NR  
420 performed bioinformatics analysis. PR, ST, MLY, AHT, JE, BH, RA performed research.  
421 LMF designed the experiment, analyzed data and wrote the manuscript. NH, AM, KO,  
422 provided intellectual input and final approval of the manuscript.

423

#### 424 **Declaration of interest**

425 Authors declare no competing interests

426

427

428

429

430

## 431 **Methods**

432

### 433 **Pluripotent stem cells culture.**

434 hPSCs were maintained in vitro in StemPro hESC SFM (Gibco) with bFGF (R&D) at 20  
435 ng/ml for SFCi55 and KLF1-mCherry-SFCi55, and at 40 ng/ml for H9 and RUNX1C-GFP.  
436 Wells were coated with CELLstart at least 1 hour before plating and cells were passaged  
437 using the StemPro EZPassage tool (ThermoFisher Scientific). Media change was  
438 performed every day and cells passaged every 3–4 days at a ratio of 1:4.

439

### 440 **hPSCs hematopoietic differentiation.**

441 hPSCs were differentiated in a xeno-free composition of SFD medium (Sturgeon *et al.*,  
442 2014), BSA was substituted with human serum albumin, HSA, (Irvine-Scientific). Day 0  
443 differentiation medium, containing 10 ng/ml BMP4 was added to the colonies prior cutting.  
444 Cut colonies were transferred to a bacteriological grade well to form embryoid bodies and  
445 cultured for two days. At day 2 media was changed and supplemented with 3  $\mu$ M CHIR  
446 (StemMacs). At day 3, embryoid bodies were collected and dissociated in Accutase  
447 (Gibco) to single cell solution, cells were plated on tissue culture grade wells in SFD  
448 medium supplemented with 5 ng/ml bFGF and 15 ng/ml VEGF ( $2 \times 10^5$  cells/well on 6 well  
449 plates or  $1 \times 10^5$  cells/well on 12 well plate). At day 6 media was changed for final  
450 hematopoietic induction in SFD medium supplemented with 5 ng/ml bFGF, 15 ng/ml  
451 VEGF, 30 ng/ml IL3, 10 ng/ml IL6, 5 ng/ml IL11, 50 ng/ml SCF, 2 U/ml EPO, 30 ng/ml  
452 TPO, 10 ng/ml FLT3L and 25 ng/ml IGF1. From day 6 onward, cytokines were replaced  
453 every two days. For further erythroid differentiation, SFD2 was used (IMDM, 10% HAS, 10  
454 ng/ml insulin (Sigma-Aldrich), 200 $\mu$ /ml Human Holo-Transferrin and Glutamax). At day 13,  
455  $3 \times 10^5$  cells were replated in SFD2 supplemented with 50 ng/ml SCF, 16.7 ng/ml FLT3L,  
456 6.7 ng/ml BMP4, 6.7 ng/ml IL3, 6.7 ng/ml IL11, 3U/ml EPO, 50  $\mu$ M IBMX and 10  $\mu$ M  
457 Hydrocortisone. At day 20,  $10^6$  cells were replated in SFD2 supplemented with 3U/ml  
458 EPO, 6.7 ng/ml IL3, 6.7 ng/ml IL11, 20 ng/ml SCF and IGF1 20 ng/ml. From day 27 to day  
459 30,  $10^6$  cells were terminally differentiation in SFD2 medium with 3U/ml EPO.

460

### 461 **Pluripotent stem cell targeting.**



462 Regulatory region spanning the transcriptional starting site of KLF1 gene was amplified  
463 using PrimeStarMAX (Takara) with the addition of KpnI sites. This 1.4 KB region, spans  
464 the distal promoter (-790) to the intronic enhancer (+600) of the KLF1 gene contain  
465 (Siatecka *et al.*, 2010). MCherry tag with polyadelintion signal was amplified using the  
466 same strategy and with the addition of flanking KpnI and EcoRI sites. PCR product were  
467 assembled into KpnI and EcoRI difgested pZDonor-AAVS1 Puromycin plasmid (Sigma-  
468 Aldrich) and ligated using the Quick Ligase Kit (New England Biolab). Correct clones were  
469 identified by sequencing. For targeting of hiPSC line SFCi55,  $10^7$  cells were  
470 electroporated with 40 $\mu$ g of targeting vector and 5  $\mu$ g of AAVS1-ZNF-Left and  $\mu$ g 5  
471 AAVS1-ZNF-Right. Cells were grown under Puromycin selection at 0.2  $\mu$ g/ml for at least 4  
472 weeks. Colonies were manually picked and expanded, genomic DNA was purified and  
473 genotyped according to manufacturer instruction in the pZDonor-AAVS1 Puromycin Kit.  
474 Correctly integrated clones were tested in differentiation condition and the clone #9 was  
475 selected for further analysis.

476

#### 477 **Cord blood erythroid differentiation.**

478 Frozen Umbilical cord blood (UCB) derived CD34<sup>+</sup> cells were purchased from Stemcell  
479 Technologies (Cat No. 70008.5) from consenting donors with protocols approval by either  
480 the Food and Drug Administration (FDA) or an Institutional Review Board (IRB). Cells were  
481 plated at  $1-6 \times 10^4$  cells/ml in ISHIT base media (Iscove's Basal Media (Biochrom AG), 5%  
482 human AB<sup>+</sup> serum, 3 U/ml heparin and 10 mg/ml Insulin) supplemented with 60 ng/ml  
483 SCF, 5 ng/ml IL3, 3 U/ml EPO, 1mM Hydrocortisone and 200 mg/ml human holo-  
484 Transferrin. At day 6, batches were frozen for further use at  $10^6$  cells/ml in 60% ISHIT  
485 media, 30% knockout serum replacement (Gibco) and 10% DMSO. Cells where thawed  
486 and cultured for additional 2 days in the same medium. At day 8, cell density was adjusted  
487 to  $10^5$  cells /ml in ISHIT media supplemented with 10 ng/ml SCF, 3 U/ml EPO, 300 mg/ml  
488 and human holo-Transferrin, and cultured for a further 3 days. Finally, cells were cultured  
489 at a density of  $10^6$  cells/ml in ISHIT medium supplemented with 3U/ml EPO and 300 mg/ml  
490 human holo-transferrin until day 21. Media was changed every 3-4 days throughout the  
491 protocol.

492

#### 493 **Flow cytometry staining and cell sorting.**



494 From hematopoietic differentiation, suspensions cells were collected from the well by  
495 aspiration of the media, adherent cells were detached from the well by using Cell  
496 Dissociation Buffer (ThermoFisher). Cells were washed with PBS + 1% BSA, counted and  
497 were stained at  $10^5$  cells for a single tube. Cells were stained with antibodies in  
498 supplementary table X, for 30' at RT gently shaking. Flow cytometry data were collected  
499 using DIVA software (BD). Sorting was performed using FACSAria Fusion (BD) and cells  
500 were collected in PBS + 1%BSA. Data were analysed using FlowJo version 10.4.2.  
501 Yolk sacs and AGM from mouse embryos were micro dissected in PBS supplemented 2%  
502 FBS and washed twice before tissue digest. Single cell suspensions were obtained by  
503 incubation in 0.125% collagenase at 37°C for 45' for AGMs and 60' for yolk sacs, followed  
504 by mechanical dissociation by pipetting and a final wash.

505

### 506 **Antibody panels**

507 The following antibodies were used for multicolour panels. Figure 1 and figure 2: CD235a-  
508 PeCy7 (1:100, BD, GA-R2(HRI2)), CD43-APC (1:100, eBioscience, eBioB4-3C1) and  
509 DAPI. Figure 4 A, E: CD235a-FITC (1:100, eBioscience, HRI2(GA-R2)), CD43-APC  
510 (1:100, eBioscience, eBioB4-3C1), CD33-Pecy7 (1:200, BioLegend, WM53), CD44-PB  
511 (1:50, BioLegend, BJ18), CD18-Pe (1:100, BioLegend, 1B4/CD18) and DAPI. Figure 4 D:  
512 CD235a-FITC (1:100, eBioscience, HRI2(GA-R2)), CD43-APC (1:100, eBioscience,  
513 eBioB4-3C1), CD33-Pecy7 (1:200, BioLegend, WM53), CD44-PB (1:50, BioLegend,  
514 BJ18), and DAPI. Figure 4 B,C, and F: CD235a-BV605 (1:300, BD, GA-R2(HRI2)), CD43-  
515 APC (1:100, eBioscience, eBioB4-3C1), CD33-Pecy7 (1:200, BioLegend, WM53), CD44-  
516 PB (1:50, BioLegend, BJ18), CD18-Pe (1:100, BioLegend, 1B4/CD18) and DAPI. Figure 5:  
517 CD44-PE (eBioscience; IM7, 1:200), CD45-BV421 (Biolegend; 30-F11, 1:200) and Draq7.  
518 Figure 6 A: CD326-BV785 (1:100, BioLegend, 9C4), CD235a-FITC (1:100, eBioscience,  
519 HRI2(GA-R2)) and DAPI. Figure 6F Figure 4 D: CD235a-FITC (1:100, eBioscience,  
520 HRI2(GA-R2)), CD43-APC (1:100, eBioscience, eBioB4-3C1), CD33-Pecy7 (1:200,  
521 BioLegend, WM53), CD44-PB (1:50, BioLegend, BJ18), and DAPI. Figure 6D: CD235a-  
522 FITC (1:100, eBioscience, HRI2(GA-R2)), CD43-APC (1:100, eBioscience, eBioB4-3C1),  
523 ICAM2-Pe (1:100, BioLegend, CBR-IC2/2), CD9-APC-Fire750 (1:100, BioLegend, HI9A),  
524 CD41-PB (1:50, BioLegend, HIP8) and Darq7 (ThermoScientific), and CD41-PB (1:50,  
525 BioLegend, HIP8) and CD42-Pe (1:100, BD, ALMA 16).

526

527 **Methylcellulose assay.**

528 Sorted cell populations were counted and plated at 5000 cells into 2 ml of methylcellulose  
529 medium (Human enriched H4435, Stemcell Technologies). Cells were incubated in the  
530 assay for 14 days and then scored.

531

532 **Single cell RNA sequencing.**

533 Two independent sample of hiPSC SFCi55 were differentiated synchronously and sorted  
534 at day 13 using CD235a-CD43<sup>+</sup> immunophenotype, viable cells were sorted using DAPI.  
535 Cell viability was also confirmed by Trypan blue stain for accurate count using TC20 cell  
536 counter (Biorad). Around 12000 cells per sample were loaded into the 10X Chromium  
537 Controller and single cell libraries were obtained using the Chromium single cell 3'  
538 Reagent Kits v2 (10XGenomics) according to manufacturer protocol. RNA concentration  
539 was obtained using Qubit RNA HS (Thermo-Fisher). Quality of the obtained libraries were  
540 verified using LabChip GX (PerkinElmer). Libraries were sequenced using HiSeq 4000  
541 technology (Illumina) at 50000 reads/cell. Data were aligned to GRCh38 using the Cell  
542 Ranger dedicated pipeline (10XGenomics). Data filtering, dimension reduction, clustering  
543 analysis and differentially expressed genes were obtained using Seurat.R package, cell  
544 trajectories was obtained using Monocle.R (code and data are available on request  
545 through corresponding authors).

546

547 **Mouse embryo and yolk sac embedding and sectioning**

548 Whole embryos with the yolk sac were fixed in 4% PFA overnight at 4°C on a gentle  
549 shaker, yolk sac was detached from the embryo after fixation and processed in parallel to  
550 the embryo. After rinsing them twice with PBS, they were placed in a solution of 15%  
551 sucrose/PBS for 3h at 4°C and then transferred into PBS with 15% sucrose and 7%  
552 gelatine at 37°C for 1-3h until they sank. Embryos and yolk sacs were mounted in gelatin  
553 using mounting specimens (Sigma-Aldrich), snap-frozen in liquid nitrogen and stored at -  
554 80°C. 7µm-thick sections were cut using Cryotome FSE (Thermo Scientific) and further  
555 processed for immunostaining or stored at -20°C

556

557 **Immunostaining and microscopy**

558 Gelatin was removed boiling the slide for 30" in PBS and washed twice in PBS,  
559 permeabilized and blocked with 5% donkey serum + 0.3% triton-X100/PBS and stained

560 with primary antibodies overnight at 4°C (CD44: Stratech KM201, 1:100; LMO4: Thermo-  
561 Fisher PA5-24248, 1:200). Following three washes in PBS, sections were stained with  
562 secondary antibodies in 0.3% triton-X100/PBS for 2 hours at room temperature (anti-rat  
563 Alexa Fluor 568, Thermo Fisher A-11077, 1:500, anti-rabbit Alexa Fluor 488, Thermo  
564 Fisher A-11008, 1:500). After three washes in PBS, slides were counterstaining in 10  
565 mg/ml DAPI. Samples were mounted with ProLong Gold Antifade mountant (Life  
566 Technologies) and dried at room temperature in the dark for a minimum of 2h, then stored  
567 at 4°C. Images were acquired using an inverted confocal microscope (Leica SP8) and  
568 analyzed using ImageJ 1.50i (<https://imagej.nih.gov/ij>).

569

### 570 **Statistical analysis**

571

572 All data are reported as mean  $\pm$  standard error mean (SEM), statistical tests and p values  
573 are reported within figure legends. Statistical analysis was performed with Graph Pad  
574 Prism version 6 and R.

575

### 576 REFERENCES

577

578 Angelos, M. G. *et al.* (2018) 'Single Cell Resolution of Human Hematoendothelial Cells  
579 Defines Transcriptional Signatures of Hemogenic Endothelium', *STEM CELLS*. John Wiley  
580 & Sons, Ltd, 36(2), pp. 206–217. doi: 10.1002/stem.2739.

581 Butler, A. *et al.* (2018a) 'Integrating single-cell transcriptomic data across different  
582 conditions, technologies, and species', *Nature Biotechnology*. Nature Publishing Group,  
583 36(5), pp. 411–420. doi: 10.1038/nbt.4096.

584 Butler, A. *et al.* (2018b) 'Integrating single-cell transcriptomic data across different  
585 conditions, technologies, and species', *Nature Biotechnology*. Nature Publishing Group,  
586 36(5), pp. 411–420. doi: 10.1038/nbt.4096.

587 Crisan, M. *et al.* (2015) 'BMP signalling differentially regulates distinct haematopoietic  
588 stem cell types', *Nature Communications*. Nature Publishing Group, 6(1), p. 8040. doi:  
589 10.1038/ncomms9040.

590 Ditadi, A., Sturgeon, C. M. and Keller, G. (2017) 'A view of human haematopoietic  
591 development from the Petri dish.', *Nature reviews. Molecular cell biology*. Nat Rev Mol Cell  
592 Biol, 18(1), pp. 56–67. doi: 10.1038/nrm.2016.127.

- 593 Fainaru, O. *et al.* (2004) 'Runx3 regulates mouse TGF- $\beta$ -mediated dendritic cell function  
594 and its absence results in airway inflammation', *The EMBO Journal*, 23, pp. 969–979. doi:  
595 10.1038/sj.emboj.7600085.
- 596 Frame, J. M. *et al.* (2016) 'Definitive Hematopoiesis in the Yolk Sac Emerges from Wnt-  
597 Responsive Hemogenic Endothelium Independently of Circulation and Arterial Identity',  
598 *STEM CELLS*, 34(2), pp. 431–444. doi: 10.1002/stem.2213.
- 599 Garcia-Alegria, E. *et al.* (2018) 'Early Human Hemogenic Endothelium Generates Primitive  
600 and Definitive Hematopoiesis In Vitro', *Stem Cell Reports*. Cell Press, 11(5), pp. 1061–  
601 1074. doi: 10.1016/J.STEMCR.2018.09.013.
- 602 Grutz, G., Forster, A. and Rabbits, T. H. (1998) 'Identification of the LMO4 gene encoding  
603 an interaction partner of the LIM-binding protein LDB1/NLI1: a candidate for displacement  
604 by LMO proteins in T cell acute leukaemia', *Oncogene*. Nature Publishing Group, 17(21),  
605 pp. 2799–2803. doi: 10.1038/sj.onc.1202502.
- 606 Guibentif, C. *et al.* (2017) 'Single-Cell Analysis Identifies Distinct Stages of Human  
607 Endothelial-to-Hematopoietic Transition'. doi: 10.1016/j.celrep.2017.03.023.
- 608 Haghverdi, L. *et al.* (2016) 'Diffusion pseudotime robustly reconstructs lineage branching',  
609 *Nature Methods*. Nature Publishing Group, 13(10), pp. 845–848. doi: 10.1038/nmeth.3971.
- 610 Hoeffel, G. *et al.* (2015) 'C-Myb(+) erythro-myeloid progenitor-derived fetal monocytes give  
611 rise to adult tissue-resident macrophages.', *Immunity*. Elsevier, 42(4), pp. 665–78. doi:  
612 10.1016/j.immuni.2015.03.011.
- 613 Ivanovs, A. *et al.* (2017) 'Human haematopoietic stem cell development: from the embryo  
614 to the dish.', *Development (Cambridge, England)*. Development, 144(13), pp. 2323–2337.  
615 doi: 10.1242/dev.134866.
- 616 Jayapal, S. R. *et al.* (2010) 'Down-regulation of Myc is essential for terminal erythroid  
617 maturation.', *The Journal of biological chemistry*. American Society for Biochemistry and  
618 Molecular Biology, 285(51), pp. 40252–65. doi: 10.1074/jbc.M110.181073.
- 619 Kalev-Zylinska, M. L. *et al.* (2003) 'Runx3 is required for hematopoietic development in  
620 zebrafish', *Developmental Dynamics*, 228(3), pp. 323–336. doi: 10.1002/dvdy.10388.
- 621 Kingsley, P. D. *et al.* (2004) 'Yolk sac-derived primitive erythroblasts enucleate during  
622 mammalian embryogenesis.', *Blood*. American Society of Hematology, 104(1), pp. 19–25.  
623 doi: 10.1182/blood-2003-12-4162.
- 624 Knapp, D. J. H. F. *et al.* (2019) 'A topological view of human CD34+ cell state trajectories  
625 from integrated single-cell output and proteomic data.', *Blood*. American Society of

- 626 Hematology, p. blood-2018-10-878025. doi: 10.1182/blood-2018-10-878025.
- 627 Lai, S. *et al.* (2018) 'Cell Discovery Comparative transcriptomic analysis of hematopoietic  
628 system between human and mouse by Microwell-seq', *Cell Discovery*, 4, p. 34. doi:  
629 10.1038/s41421-018-0038-x.
- 630 Lammers, R. *et al.* (2002) 'Monoclonal antibody 9C4 recognizes epithelial cellular  
631 adhesion molecule, a cell surface antigen expressed in early steps of erythropoiesis',  
632 *Experimental Hematology*. Elsevier, 30(6), pp. 537–545. doi: 10.1016/S0301-  
633 472X(02)00798-1.
- 634 Lopez-Yrigoyen, M. *et al.* (2018) 'A human iPSC line capable of differentiating into  
635 functional macrophages expressing ZsGreen: a tool for the study and *in vivo* tracking of  
636 therapeutic cells', *Philosophical Transactions of the Royal Society B: Biological Sciences*,  
637 373(1750), p. 20170219. doi: 10.1098/rstb.2017.0219.
- 638 Mass, E. *et al.* (2016) 'Specification of tissue-resident macrophages during  
639 organogenesis.', *Science (New York, N.Y.)*. American Association for the Advancement of  
640 Science, 353(6304), p. aaf4238. doi: 10.1126/science.aaf4238.
- 641 McGarvey, A. C. *et al.* (2017) 'A molecular roadmap of the AGM region reveals BMPER as  
642 a novel regulator of HSC maturation.', *The Journal of experimental medicine*. J Exp Med,  
643 214(12), pp. 3731–3751. doi: 10.1084/jem.20162012.
- 644 McGrath, K. E. *et al.* (2008) 'Enucleation of primitive erythroid cells generates a transient  
645 population of "pyrenocytes" in the mammalian fetus.', *Blood*. American Society of  
646 Hematology, 111(4), pp. 2409–17. doi: 10.1182/blood-2007-08-107581.
- 647 McGrath, K. E. *et al.* (2015) 'Distinct Sources of Hematopoietic Progenitors Emerge before  
648 HSCs and Provide Functional Blood Cells in the Mammalian Embryo', *Cell Reports*. doi:  
649 10.1016/j.celrep.2015.05.036.
- 650 Medvinsky, A. and Dzierzak, E. (1996) 'Definitive Hematopoiesis Is Autonomously Initiated  
651 by the AGM Region', *Cell*. Cell Press, 86(6), pp. 897–906. doi: 10.1016/S0092-  
652 8674(00)80165-8.
- 653 Moreau, T. *et al.* (2016) 'Large-scale production of megakaryocytes from human  
654 pluripotent stem cells by chemically defined forward programming', *Nature*  
655 *Communications*. Nature Publishing Group, 7(1), p. 11208. doi: 10.1038/ncomms11208.
- 656 Ng, E. S. *et al.* (2016) 'Differentiation of human embryonic stem cells to HOXA+  
657 hemogenic vasculature that resembles the aorta-gonad-mesonephros', *Nature*  
658 *Biotechnology*. Nature Publishing Group, 34(11), pp. 1168–1179. doi: 10.1038/nbt.3702.

- 659 Oatley, M. *et al.* (2018) 'Single-cell transcriptomics identifies CD44 as a new marker and  
660 regulator of haematopoietic stem cells development', *bioRxiv*. Cold Spring Harbor  
661 Laboratory, p. 338178. doi: 10.1101/338178.
- 662 Olivier, E. N. *et al.* (2016) 'High-Efficiency Serum-Free Feeder-Free Erythroid  
663 Differentiation of Human Pluripotent Stem Cells Using Small Molecules.', *Stem cells*  
664 *translational medicine*. Stem Cells Transl Med, 5(10), pp. 1394–1405. doi:  
665 10.5966/sctm.2015-0371.
- 666 Palis, J. *et al.* (1999) 'Development of erythroid and myeloid progenitors in the yolk sac  
667 and embryo proper of the mouse.', *Development (Cambridge, England)*. Development,  
668 126(22), pp. 5073–84. Available at: <http://www.ncbi.nlm.nih.gov/pubmed/10529424>  
669 (Accessed: 23 January 2019).
- 670 Palis, J. (2016) 'Hematopoietic stem cell-independent hematopoiesis: emergence of  
671 erythroid, megakaryocyte, and myeloid potential in the mammalian embryo.', *FEBS letters*.  
672 FEBS Lett, 590(22), pp. 3965–3974. doi: 10.1002/1873-3468.12459.
- 673 Paul, F. *et al.* (2015) 'Transcriptional Heterogeneity and Lineage Commitment in Myeloid  
674 Progenitors', *Cell*. Cell Press, 163(7), pp. 1663–1677. doi: 10.1016/J.CELL.2015.11.013.
- 675 Qiu, X. *et al.* (2017) 'Reversed graph embedding resolves complex single-cell trajectories',  
676 *Nature Methods*. Nature Publishing Group, 14(10), pp. 979–982. doi: 10.1038/nmeth.4402.
- 677 Rodriguez-Fraticelli, A. E. *et al.* (2018) 'Clonal analysis of lineage fate in native  
678 haematopoiesis.', *Nature*. Nature, 553(7687), pp. 212–216. doi: 10.1038/nature25168.
- 679 Schulz, C. *et al.* (2012) 'A lineage of myeloid cells independent of Myb and hematopoietic  
680 stem cells.', *Science (New York, N.Y.)*. Science, 336(6077), pp. 86–90. doi:  
681 10.1126/science.1219179.
- 682 Siatecka, M. and Bieker, J. J. (2011) 'The multifunctional role of EKLF/KLF1 during  
683 erythropoiesis.', *Blood*. The American Society of Hematology, 118(8), pp. 2044–54. doi:  
684 10.1182/blood-2011-03-331371.
- 685 Soragni, A. *et al.* (2015) 'Toxicity of Eosinophil MBP Is Repressed by Intracellular  
686 Crystallization and Promoted by Extracellular Aggregation', *Molecular Cell*. Cell Press,  
687 57(6), pp. 1011–1021. doi: 10.1016/J.MOLCEL.2015.01.026.
- 688 Souilhol, C. *et al.* (2016) 'ARTICLE Inductive interactions mediated by interplay of  
689 asymmetric signalling underlie development of adult haematopoietic stem cells'. doi:  
690 10.1038/ncomms10784.
- 691 Sroczynska, P. *et al.* (2009) 'The differential activities of Runx1 promoters define



- 692 milestones during embryonic hematopoiesis.’, *Blood*. American Society of Hematology,  
693 114(26), pp. 5279–89. doi: 10.1182/blood-2009-05-222307.
- 694 Stremmel, C. *et al.* (2018) ‘Yolk sac macrophage progenitors traffic to the embryo during  
695 defined stages of development’, *Nature Communications*. Nature Publishing Group, 9(1),  
696 p. 75. doi: 10.1038/s41467-017-02492-2.
- 697 Sturgeon, C. M. *et al.* (2014) ‘Wnt signaling controls the specification of definitive and  
698 primitive hematopoiesis from human pluripotent stem cells’, *Nature Biotechnology*. Nature  
699 Publishing Group, 32(6), pp. 554–561. doi: 10.1038/nbt.2915.
- 700 Tober, J. *et al.* (2007) ‘The megakaryocyte lineage originates from hemangioblast  
701 precursors and is an integral component both of primitive and of definitive hematopoiesis.’,  
702 *Blood*. American Society of Hematology, 109(4), pp. 1433–41. doi: 10.1182/blood-2006-  
703 06-031898.
- 704 van Galen, P. *et al.* (2014) ‘Reduced Lymphoid Lineage Priming Promotes Human  
705 Hematopoietic Stem Cell Expansion’, *Cell Stem Cell*, 14(1), pp. 94–106. doi:  
706 10.1016/j.stem.2013.11.021.
- 707 Velten, L. *et al.* (2017) ‘Human haematopoietic stem cell lineage commitment is a  
708 continuous process’. doi: 10.1038/ncb3493.
- 709 Vo, L. T. and Daley, G. Q. (2015) ‘De novo generation of HSCs from somatic and  
710 pluripotent stem cell sources.’, *Blood*. American Society of Hematology, 125(17), pp.  
711 2641–8. doi: 10.1182/blood-2014-10-570234.
- 712 Vodyanik, M. A. *et al.* (2006) ‘Leukosialin (CD43) defines hematopoietic progenitors in  
713 human embryonic stem cell differentiation cultures.’, *Blood*. American Society of  
714 Hematology, 108(6), pp. 2095–105. doi: 10.1182/blood-2006-02-003327.
- 715 Wadman, I. A. *et al.* (1997) ‘The LIM-only protein Lmo2 is a bridging molecule assembling  
716 an erythroid, DNA-binding complex which includes the TAL1, E47, GATA-1 and Ldb1/NLI  
717 proteins.’, *The EMBO journal*. European Molecular Biology Organization, 16(11), pp.  
718 3145–57. doi: 10.1093/emboj/16.11.3145.
- 719 Wilson, N. K. *et al.* (2010) ‘Combinatorial Transcriptional Control In Blood Stem/Progenitor  
720 Cells: Genome-wide Analysis of Ten Major Transcriptional Regulators’, *Cell Stem Cell*.  
721 Cell Press, 7(4), pp. 532–544. doi: 10.1016/J.STEM.2010.07.016.
- 722 Yang, C.-T. *et al.* (2017) ‘Activation of KLF1 Enhances the Differentiation and Maturation  
723 of Red Blood Cells from Human Pluripotent Stem Cells’, *STEM CELLS*. John Wiley &  
724 Sons, Ltd, 35(4), pp. 886–897. doi: 10.1002/stem.2562.



725 Zöller, M. (2015) 'CD44, Hyaluronan, the Hematopoietic Stem Cell, and Leukemia-  
726 Initiating Cells.', *Frontiers in immunology*. Frontiers Media SA, 6, p. 235. doi:  
727 10.3389/fimmu.2015.00235.

728

729

730 FIGURE 1

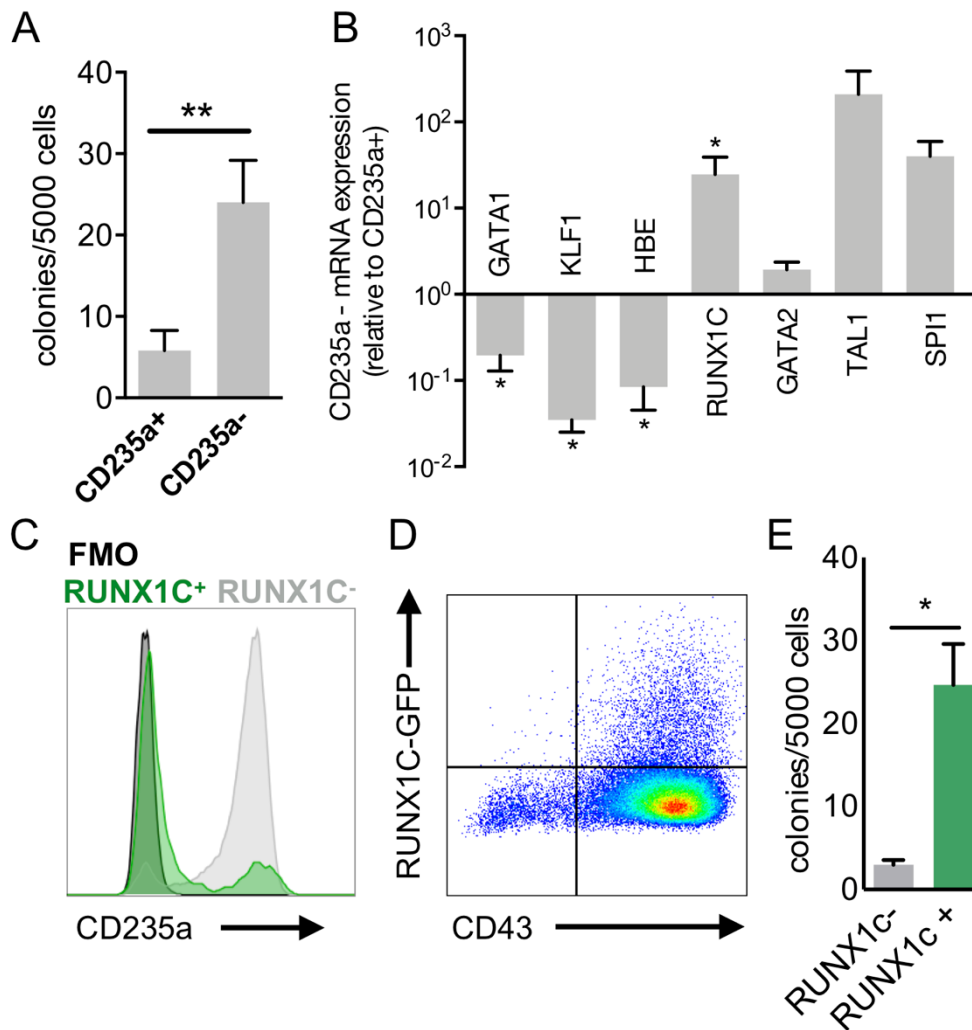

732 **Figure 1 - Human definitive hematopoietic progenitors reside in the CD235a<sup>-</sup>CD43<sup>+</sup>**  
733 **compartment.**

734 **(A)** Colony forming potential of sorted CD235a<sup>+</sup> and CD235a<sup>-</sup> cells (n=5, p<0.01, paired t-  
735 test). **(B)** Gene expression profile of CD235a<sup>-</sup> cells, relative to CD235a<sup>+</sup> (n=6, \*p<0.05,  
736 Wilcoxon test). **(C)** Distribution of RUNX1C<sup>+</sup> and RUNX1C<sup>-</sup> in relationship to CD235a. **(D)**  
737 RUNX1C-GFP expression in relation to CD43. **(E)** Colony forming potential of sorted  
738 RUNX1C<sup>+</sup> and RUNX1C<sup>-</sup> cells (n=3, p<0.05, paired t-test).

739

740

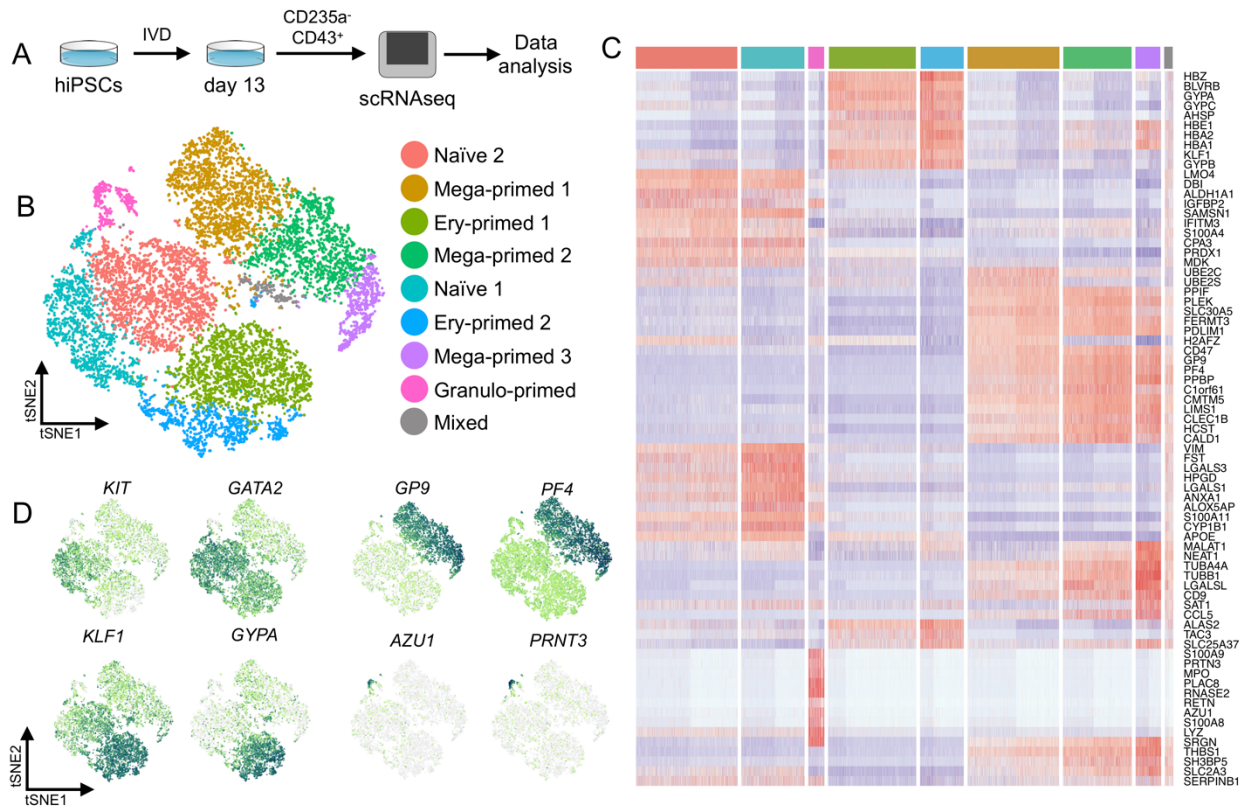

741

742 **Figure 2 - Single cell transcriptome analysis identifies cluster of progenitors and**  
743 **primed cells.**

744 **(A)** Schematic of the single cell RNA sequencing experiment. **(B)** tSNE visualization of  
745 11,420 cells divided into 9 clusters. **(C)** Heatmap of the top 10 marker genes for each  
746 cluster. **(D)** Gene expression of cell type markers on tSNE.

747

748

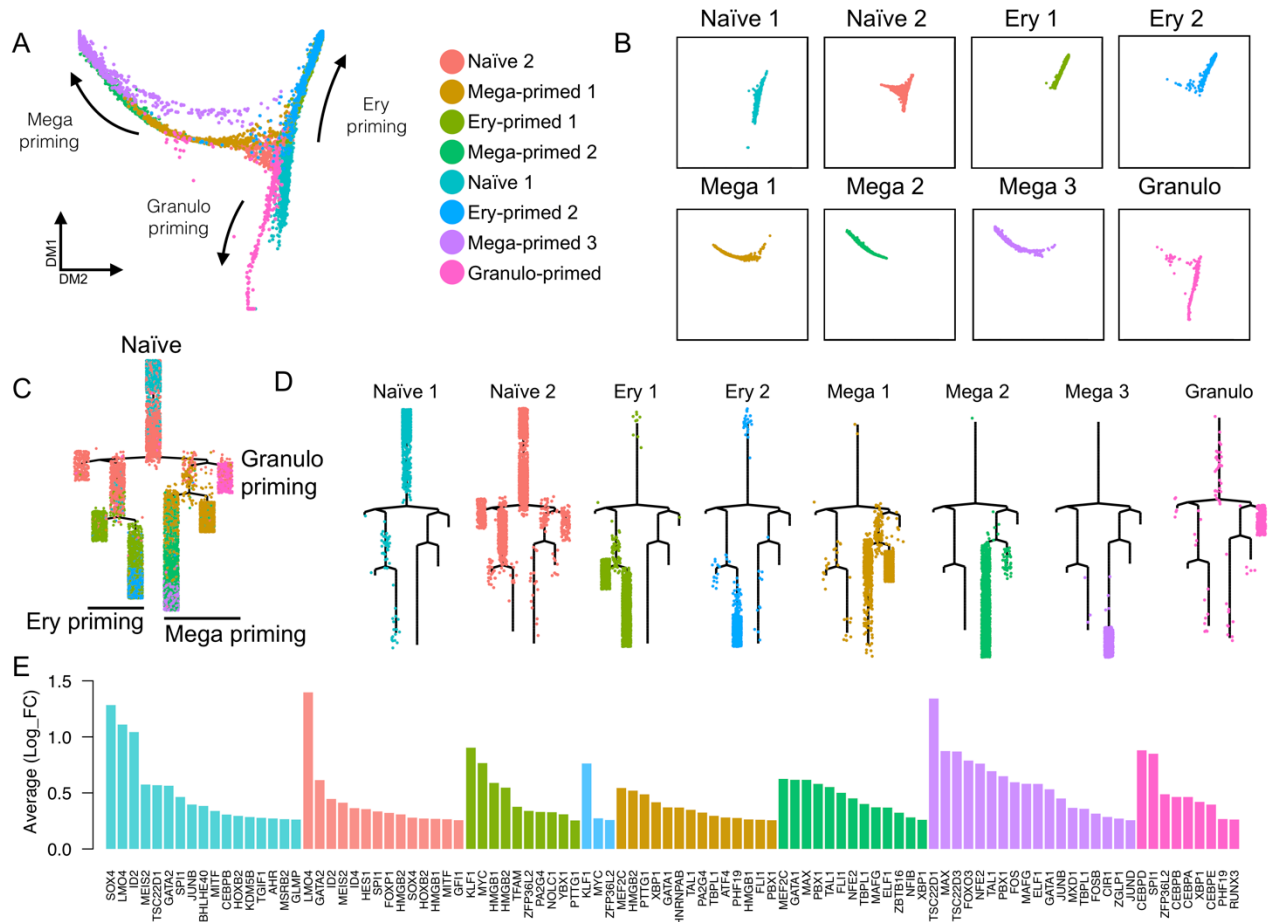

749

750 **Figure 3 - Trajectory analyses confirm progenitors identity and outlines priming**  
 751 **directions.**

752 **(A)** Diffusion analysis plot shows progenitor in the core region with primed cells  
 753 describing the different direction of priming. **(B)** Representation of single clusters on the  
 754 diffusion plot. **(C)** Monocle trajectory analysis with shows same priming obtained from the  
 755 diffusion plot, **(D)** single cluster visualized on trajectory. **(E)** Top transcription factors  
 756 expression in each cluster.

757

758 FIGURE 4

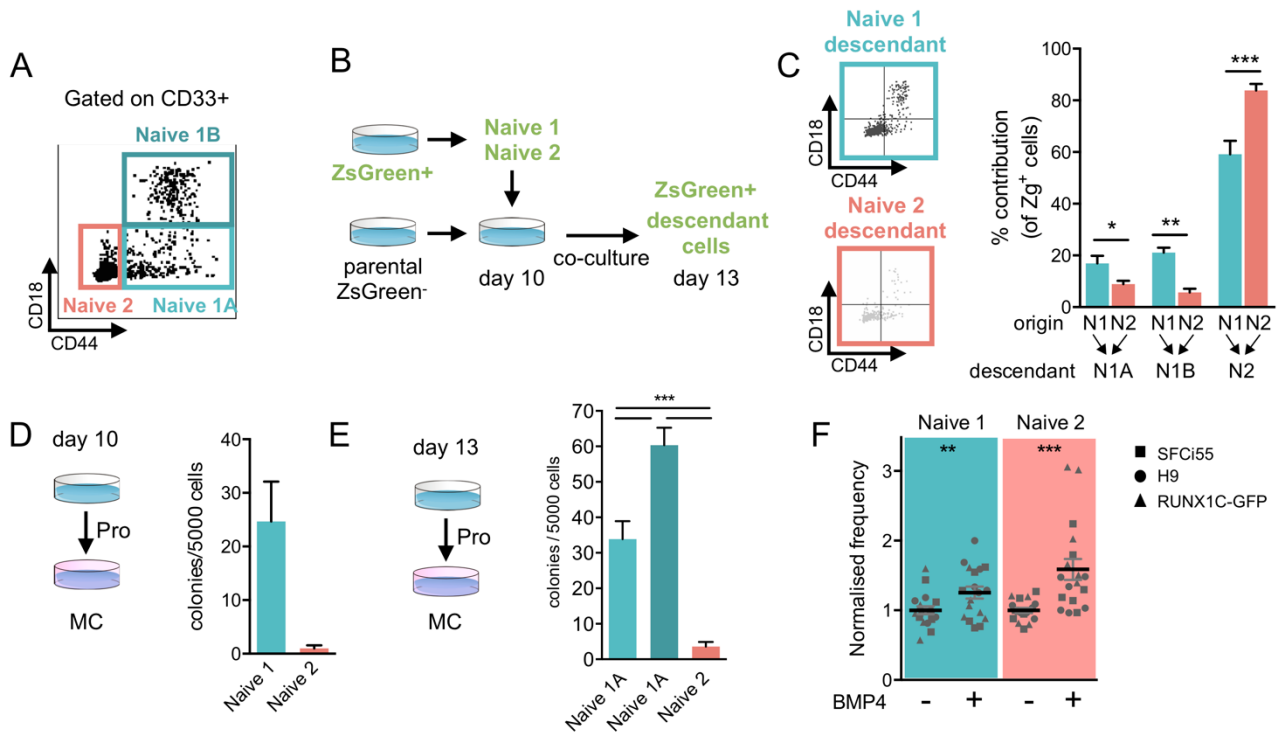

759

760 **Figure 4 - CD44 identifies clonogenic hematopoietic progenitors that can be**  
 761 **expanded upon BMP4 addition.**

762 (A) Scatter plot of flow cytometry profile of Naïve 1, 2A and 2B cells are gated on CD235a-  
 763 CD43+CD33+. (B) Schematic of the chimeric culture system to trace cells during the  
 764 differentiation. (C) Contribution of Naïve 1, in teal, and Naïve 2, in pink, to the Naïve 1, 2A  
 765 and 2B compartment (n=6, multinomial logistic regression, \*p<0.05, \*\*p<0.01, \*\*\*p<0.005).  
 766 (D) Colony forming assay result for Naïve 1 and Naïve 2 cells sorted at day 10 (n=3,  
 767 paired t-Test p=0.0753) CD44 expression distribution in Naïve 1 and in Naïve 2 cluster. (E)  
 768 Colony forming assay result for Naïve 1, 2A and 2B cells sorted at day 13 (n=9, Holm-  
 769 Sidak's test, p<=0.001). (F) Frequency of Naïve 1 and Naïve 2 cells upon addition of  
 770 BMP4 (n=6 for each cell line, mixed effects model, \*\*p<0.005, \*\*\*p<0.001).

771

772

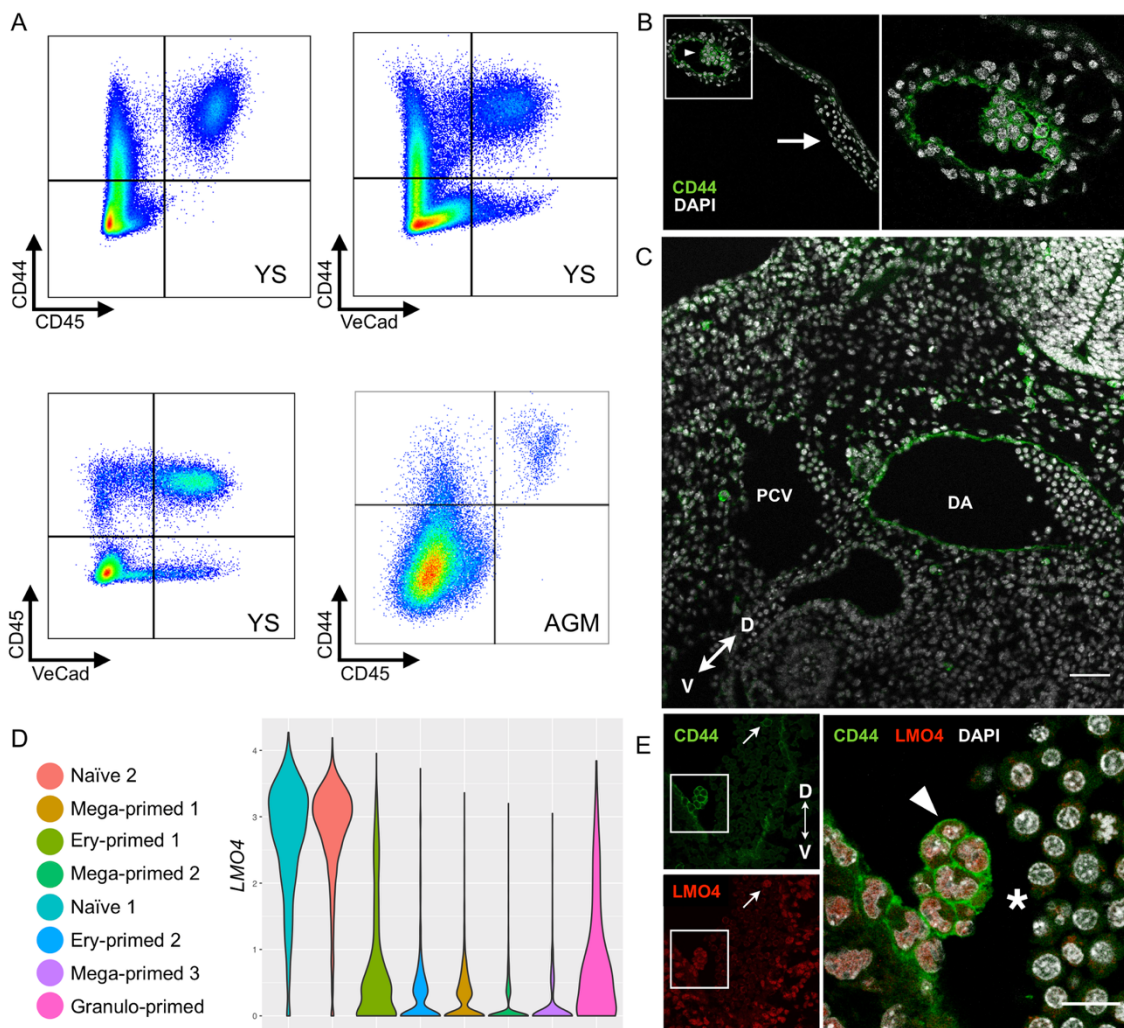

773

774 **Figure 5 - CD44 and LMO4 is co-expressed in human and mouse definitive**  
775 **progenitors.**

776 (A) Flow cytometry of E11 yolk sac showing expression of CD44 in relation to CD45 and  
777 VeCad, and AGM region at E10.5. (B) CD44 immunostaining in E10.5 yolk sac  
778 (arrowhead: CD44<sup>+</sup> vessel and hematopoietic cluster, arrow: CD44<sup>-</sup> vessel). (C) CD44  
779 immunostaining of the dorsal region of the mouse embryo at E10.5 showing expression  
780 on arterial endothelial cells (DA - dorsal aorta, PCV - posterior cardinal vein, bar=50µm).  
781 (D) LMO4 gene expression distribution across clusters. (E) LMO4 and CD44  
782 immunostaining in the AGM region (transverse section, zoomed image on intra-aortic  
783 cluster bar=15µm, arrow: circulating cell CD44<sup>+</sup>LMO4<sup>+</sup>, arrowhead: IAHC, asterisk:  
784 circulating negative cells).

785



786 **FIGURE 6**

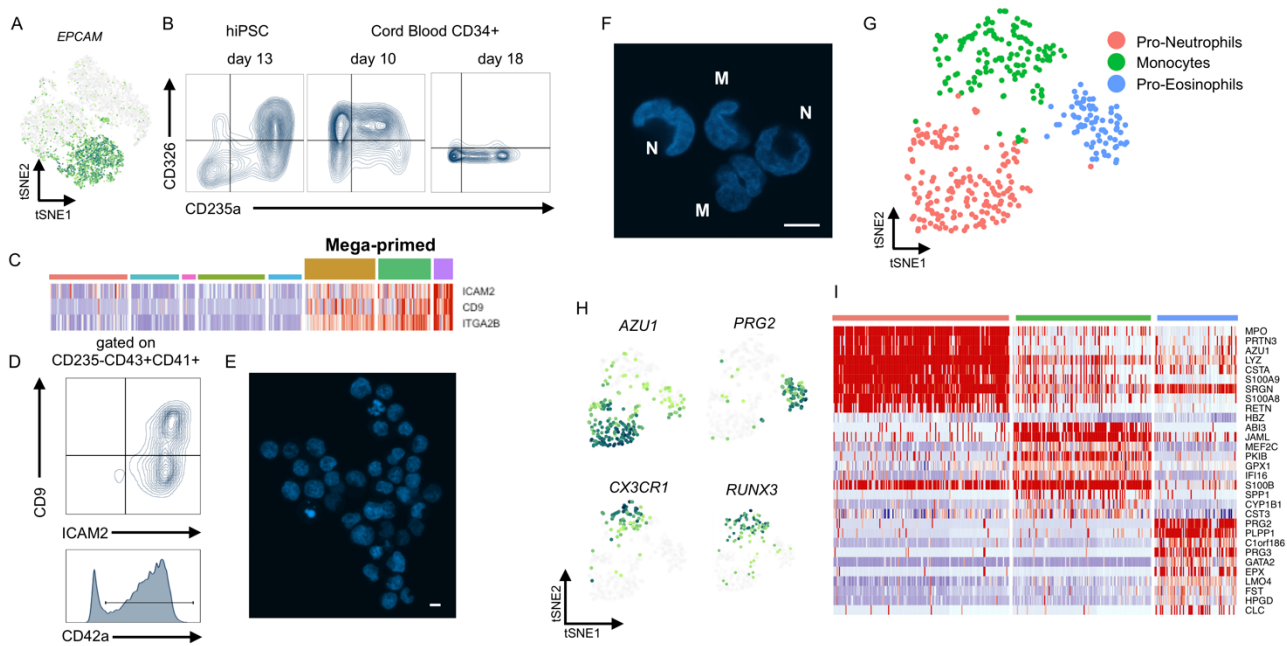

787

788 **Figure 6 - Primed clusters show immature lineage features of erythroid cells,**  
 789 **megakaryocytes, neutrophils, eosinophils and monocytes.**

790 (A) *EPCAM* expression on tSNE. (B) Flow cytometry analysis of *EPCAM* expression hiPSC  
 791 derived progenitors at day 13 and cord blood CD34+ differentiated in vitro. (C) Heatmap  
 792 showing expression of ICAM2, CD9, and ITGA2B (also known as CD41). (D) Flow  
 793 cytometry analysis of CD9 and ICAM2 expression in megakaryocytes biased progenitors  
 794 gated on CD235a-CD43-CD41+, and CD42a expression in the same gated population. (E)  
 795 DNA staining of sorted CD41+CD42+ cells and. (F) DNA staining of sorted CD235a-  
 796 CD43-CD33+CD44-CD18+. (G) tSNE visualization of subclustered granulopoietic cells,  
 797 showing 3 cell identities. (H) Gene expression of subclusters' marker genes on tSNE. (I)  
 798 Heatmap of the top 10 marker genes for each subcluster.

799
